# Supplementary material for: Thermoelectric properties of Ag-doped CuS nanocomposites synthesized by a facile polyol method
Source: Royal Society of Chemistry journal article supplement (doi:10.1039/c7cp07986a), 2018-01-01
Supplement: c7cp07986a1.pdf [file c7cp07986a1.pdf]

## Electronic Supplementary Information

# Thermoelectric properties of Ag-doped CuS nanocomposites synthesized by a facile polyol method

*Tarachand<sup>a</sup>, S. Hussain<sup>b</sup>, N. P. Lalla<sup>a</sup>, Y.-K. Kuo<sup>c</sup>, A. Lakhani<sup>a</sup>, V. G. Sathe<sup>a</sup>, U. Deshpande<sup>a</sup> and G. S. Okram<sup>a</sup>*

<sup>a</sup>UGC-DAE Consortium for Scientific Research, University Campus, Khandwa Road, Indore-452001, India

<sup>b</sup>UGC-DAE Consortium for Scientific Research, Kalpakkam Node, Kokilamedu-603104, India <sup>c</sup>Department of Physics, National Dong Hwa University, Hualien 97401, Taiwan.

**KEYWORDS.** Covellite CuS, hexagonal nanodisks, structural transition and thermoelectric.

**X-ray Diffraction (XRD)** Lab source XRD measurements were performed for all samples in powder form using Bruker D8 Advance X-ray diffractometer with Cu K $\alpha$  radiation (0.154 nm) in the angle range of 20-80° in  $\theta$  -  $2\theta$  geometry (Figure S1); X-rays were detected using a fast counting detector based on silicon strip technology (Bruker LynxEye detector). Synchrotron radiation XRD data with  $\lambda = 0.876$  Å (E = 15.77 keV) was collected at BL-18B (Indian beamline), Photon Factory, Tsukuba, Japan, with a beam current of 401 mA in the angle range of 5° - 21.5° for angular step of 0.005° with a point detector (Cyberstar) on powdered samples.

Average crystallite size of Cu<sub>1-x</sub>Ag<sub>x</sub>S; x = 0, 0.1, 0.2, 0.5, 0.75 and 1 samples are calculated from Scherrer's

formula: 
$$L = \frac{\lambda}{K \beta \cos \theta}$$

where K,  $\lambda$ ,  $\beta$  and  $\theta$  are shape factor (~0.9), X-ray wavelength, full width half maxima of diffraction peaks and Bragg's angle respectively.

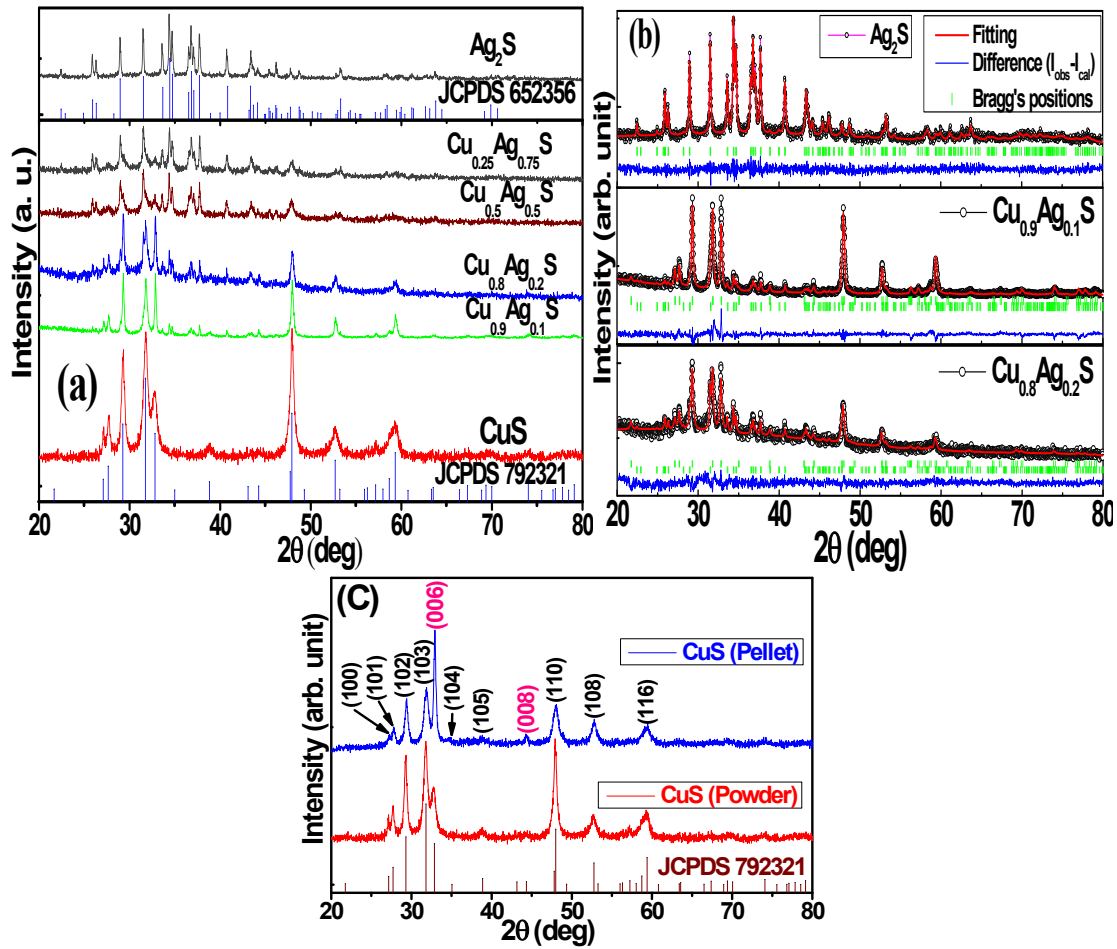

**Figure S1.** (a) XRD data of  $\text{Cu}_{1-x}\text{Ag}_x\text{S}$ , where  $x = 0 - 1$  collected from lab source XRD with  $\lambda = 1.54 \text{ \AA}$ , (b) Rietveld refinement of powder XRD of  $x = 0.1, 0.2$  and  $1$ , and (c) XRD patterns of pure  $\text{CuS}$  in both powder and pellet forms as indicated.

**Table S1** Refined Wyckoff positions and occupations of Cu and S atoms at different Wyckoff sites in unit cell of  $\text{CuS}$ .

| Atoms | Wyckoff sites | Wyckoff positions (x,y,z) | Occupation |
|-------|---------------|---------------------------|------------|
| Cu1   | 2d            | 2/3, 1/3, 0.25            | 0.49715    |
| Cu2   | 4f            | 1/3, 2/3, 0.10806         | 0.98827    |
| S1    | 2c            | 1/3, 2/3, 0.25            | 0.50380    |
| S2    | 4e            | 0, 0, 0.06193             | 1.01183    |

**Table S2** Calculated lattice parameters for  $\text{Cu}_{1-x}\text{Ag}_x\text{S}$ , where  $x = 0 - 0.75$  using crystallographic relations for

$$d_{hkl} = \frac{1}{\left(\frac{4(h^2 + hk + k^2)}{3a^2} + \frac{l^2}{c^2}\right)^{\frac{1}{2}}}$$

hexagonal system such as  $29.3^\circ$  (hkl=102),  $31.9^\circ$  (103) and  $32.7^\circ$  (006). and  $2d\sin \theta = n\lambda$  for most prominent peaks centered at

| Sample name                                | a (Å) | c (Å)  |
|--------------------------------------------|-------|--------|
| CuS pure                                   | 3.791 | 16.393 |
| $\text{Cu}_{0.9}\text{Ag}_{0.1}\text{S}$   | 3.796 | 16.359 |
| $\text{Cu}_{0.8}\text{Ag}_{0.2}\text{S}$   | 3.796 | 16.340 |
| $\text{Cu}_{0.5}\text{Ag}_{0.5}\text{S}$   | 3.795 | 16.364 |
| $\text{Cu}_{0.25}\text{Ag}_{0.75}\text{S}$ | --    | 16.336 |

**Table S3** Obtained parameters from Rietveld refinement of  $\text{Cu}_{1-x}\text{Ag}_x\text{S}$ ;  $x=0, 0.1, 0.2$  and 1. Errors are written in parentheses.

| Parameters                            | CuS<br>(Hexagonal) | $\text{Cu}_{0.9}\text{Ag}_{0.1}\text{S}$<br>(Mix Phase) | $\text{Cu}_{0.8}\text{Ag}_{0.2}\text{S}$<br>(Mix Phase) | $\text{Ag}_2\text{S}$<br>(Monoclinic) |
|---------------------------------------|--------------------|---------------------------------------------------------|---------------------------------------------------------|---------------------------------------|
| a (Å), H;<br>M                        | 3.791(1)<br>--     | 3.795(1)<br>4.228(3)                                    | 3.796(1)<br>4.232(2)                                    | --<br>4.230(1)                        |
| b (Å), H;<br>M                        | 3.791(1)<br>--     | 3.795(1)<br>6.936(4)                                    | 3.796(1)<br>6.933(3)                                    | --<br>6.932(2)                        |
| c (Å), H;<br>M                        | 16.390(3)<br>--    | 16.365(3)<br>7.874(5)                                   | 16.372(4)<br>7.872(3)                                   | --<br>7.875(2)                        |
| V (Å <sup>3</sup> ), H;<br>M          | 204.313<br>--      | 204.118<br>227.704                                      | 204.280<br>227.728                                      | --<br>227.691                         |
| $\rho$ (g.cm <sup>-3</sup> ), H;<br>M | 3.114<br>--        | 3.174<br>7.225                                          | 3.109<br>7.228                                          | --<br>7.229                           |
| Phase-fraction; H;<br>M               | 100%<br>--         | 90.98%<br>09.02%                                        | 80.45%<br>19.55%                                        | --<br>100%                            |

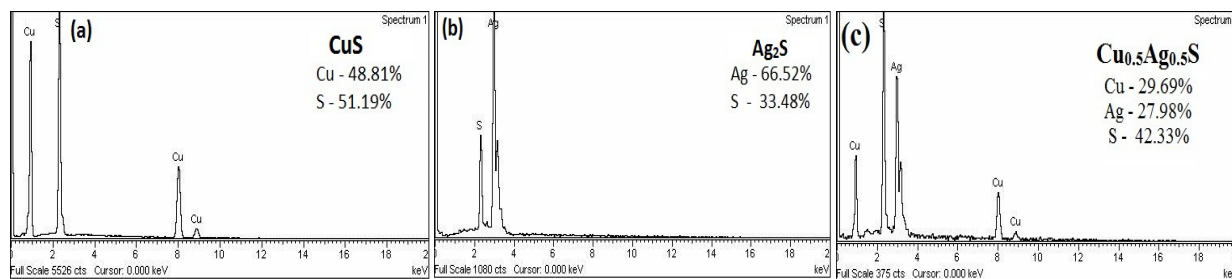

**Figure S2.** EDAX of cold pressed pellets of (a) CuS, (b)  $\text{Ag}_2\text{S}$  and (c)  $\text{Cu}_{0.5}\text{Ag}_{0.5}\text{S}$ .

**Transmission electron microscopy (TEM)** TEM images and selected area electron diffraction (SAED) of CuS nanodisks were recorded using transmission electron microscopy by drop-casting the well-sonicated solution of a few milligrams of nanoparticles dispersed in about 4 ml methanol on copper grid coated with an amorphous carbon film. TEM measurements were performed with a TECHNAI-20-G<sup>2</sup> operating at a 200 kV accelerating voltage.

**Field emission scanning electron microscopy (FESEM)** FESEM images of CuS NDs were collected using Carl Zeiss AURIGA FIBSEM in secondary emissions mode operated at 4.0 kV applied voltage. Sample was prepared by sprinkling of a small amount of the powder on a conducting tape. Then tap the holder to from the sides to remove the loose powders and followed by gold coating for a thickness of 1 nm by sputtering.

**X-ray photoelectron spectroscopy (XPS)** XPS measurements were performed on an X-ray photoelectron spectroscope (SPECS, Germany) using Al K $\alpha$  radiation with an anode voltage of 13 kV and an emission current of

22.35 mA. Powder sample was consolidated into pellet by applying 500 MPa pressure. A full-scan survey spectrum was recorded with an energy of 40 eV and high-resolution spectra were recorded with energy of 30 eV.

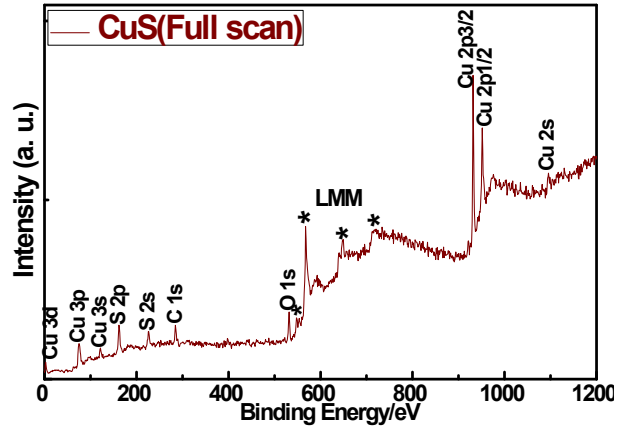

**Figure S3.** Full scan XPS survey of synthesized CuS nanoparticles.

**Raman spectroscopy** Room temperature Raman spectroscopic measurement was performed using Jobin Yvon Horibra LABRAM HR-800 Visible instrument equipped with an Ar ion laser of wavelength 473 nm and a CCD detector giving over all spectral resolution of  $\sim 1 \text{ cm}^{-1}$ . Powder sample was consolidated into pellet by applying 500 MPa pressure and data was recorded for 120 second in air.

**Table S4.** Obtained density (mass/volume) for all consolidated pellets  $\text{Cu}_{1-x}\text{Ag}_x\text{S}$ ;  $x = 0 - 1$  nanocomposites. Estimated error in the calculation is  $\pm 0.05$ .

| Sample name                    | CuS  | $x=0.05$ | $x=0.1$ | $x=0.2$ | $x=0.5$ | $x=0.75$ | $x=1 (\text{Ag}_2\text{S})$ |
|--------------------------------|------|----------|---------|---------|---------|----------|-----------------------------|
| Density ( $\text{g.cm}^{-3}$ ) | 3.01 | 4.58     | 4.61    | 5.03    | 5.64    | 6.45     | 7.19                        |

**Table S5.** Hall coefficient for pure CuS obtained from the slope of Hall resistivity ( $\rho_{xy}$ ) versus applied magnetic field graph at fixed temperatures (10, 50, 100, 200 and 300 K) and calculated charge carrier density ( $n$ ) and mobility ( $\mu$ ), using  $\sigma = ne\mu$  and  $R_H = 1/ne$  relation.

| Temperature | CuS (pure)                                     |                                      |                                                   | $\text{Cu}_{0.9}\text{Ag}_{0.1}\text{S}$       |                                      |                                                   |
|-------------|------------------------------------------------|--------------------------------------|---------------------------------------------------|------------------------------------------------|--------------------------------------|---------------------------------------------------|
|             | $R \text{ (cm}^3\text{C}^{-1}) \times 10^{-4}$ | $n \text{ (cm}^{-3}) \times 10^{21}$ | $\mu \text{ (cm}^2\text{V}^{-1}\text{.Sec}^{-1})$ | $R \text{ (cm}^3\text{C}^{-1}) \times 10^{-4}$ | $n \text{ (cm}^{-3}) \times 10^{21}$ | $\mu \text{ (cm}^2\text{V}^{-1}\text{.Sec}^{-1})$ |
| 10 K        | + 8.0516                                       | 7.7518                               | 1.4197                                            | +9.7347                                        | 6.4116                               | 2.4283                                            |
| 50 K        | + 7.9953                                       | 7.8065                               | 1.3520                                            | +8.9871                                        | 6.9450                               | 2.0648                                            |
| 100 K       | + 7.0069                                       | 8.9076                               | 1.1159                                            | +8.8644                                        | 7.0411                               | 1.8060                                            |
| 200 K       | +6.8382                                        | 9.1275                               | 0.9665                                            | +6.9363                                        | 8.9989                               | 1.1744                                            |
| 300 K       | + 13.3821                                      | 4.6641                               | 1.7504                                            | +6.4692                                        | 9.6481                               | 0.9770                                            |

**Table S6.** Thermoelectric power factor, thermal conductivity and figure of merit for  $\text{Cu}_{1-x}\text{Ag}_x\text{S}$ ;  $x = 0-0.75$  nanocomposites at 300 K.

| Sample name                              | $S^2\sigma \text{ (}\mu\text{Wm}^{-1}\text{K}^{-2})$ | $\kappa \text{ (Wm}^{-1}\text{K}^{-1})$ | ZT                        |
|------------------------------------------|------------------------------------------------------|-----------------------------------------|---------------------------|
| CuS pure                                 | 23.89                                                | 3.653                                   | 0.001962 ( $\sim 0.002$ ) |
| $\text{Cu}_{0.9}\text{Ag}_{0.1}\text{S}$ | 32.69                                                | 3.325                                   | 0.002945 ( $\sim 0.003$ ) |

|                                            |       |       |          |
|--------------------------------------------|-------|-------|----------|
| $\text{Cu}_{0.8}\text{Ag}_{0.2}\text{S}$   | 15.07 | 2.831 | 0.001597 |
| $\text{Cu}_{0.5}\text{Ag}_{0.5}\text{S}$   | 3.8   | 2.345 | 0.000486 |
| $\text{Cu}_{0.25}\text{Ag}_{0.75}\text{S}$ | 1.12  | 1.771 | 0.000190 |

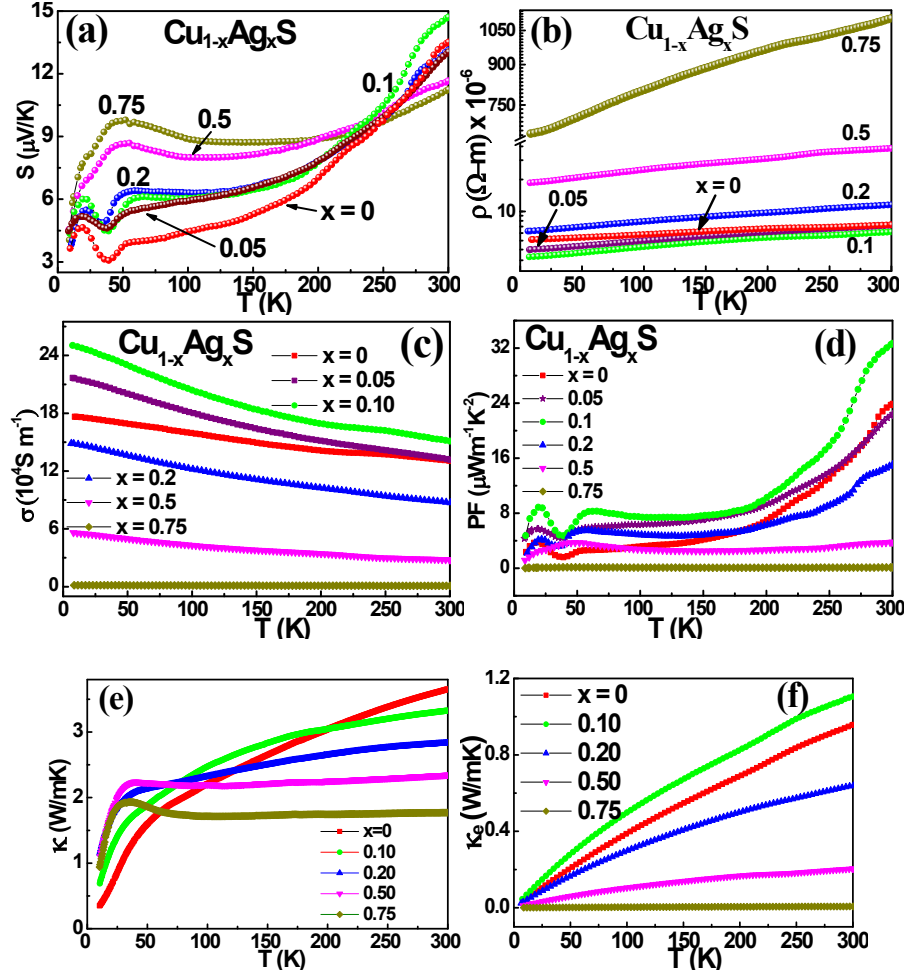

**Figure S4.** Temperature dependence of (a) Seebeck coefficient, (b) electrical resistivity, (c) electrical conductivity, (d) thermoelectric power factor, (e) total thermal conductivity and (f) electrical part of thermal conductivity of  $\text{Cu}_{1-x}\text{Ag}_x\text{S}$ :  $x = 0-0.75$ .

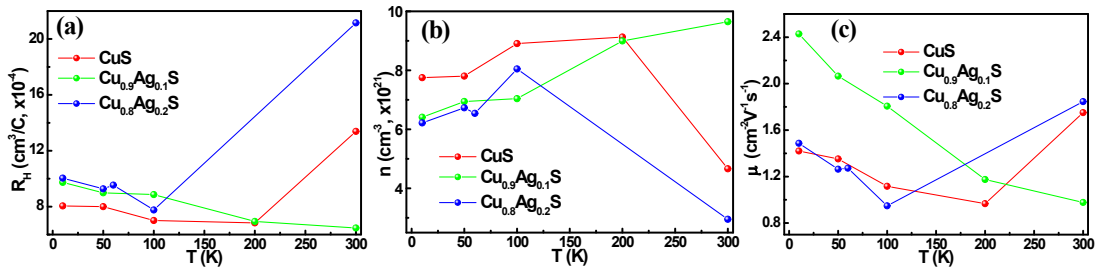

**Figure S5** Temperature dependence of (a) Hall coefficient, (b) charge carrier concentration and (c) carrier mobility of  $\text{Cu}_{1-x}\text{Ag}_x\text{S}$ :  $x = 0, 0.1$  and  $0.2$ .
